# Supplementary figures and images for: The association of oxidative stress biomarkers with type 2 diabetes mellitus: a systematic review and meta-analysis
Source: Research Square preprint supplement (doi:10.21203/rs.3.rs-319443/v1), 2021-04-12

**Supplementary Fig. 1:**

(a)

(b)


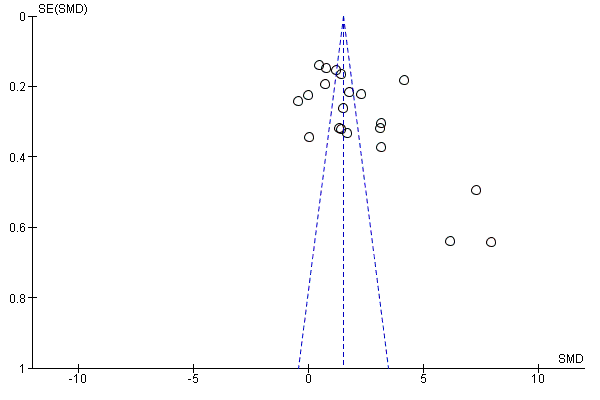

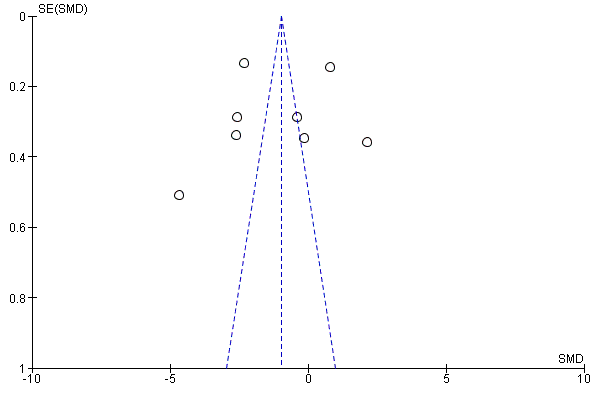


(d)

(c)


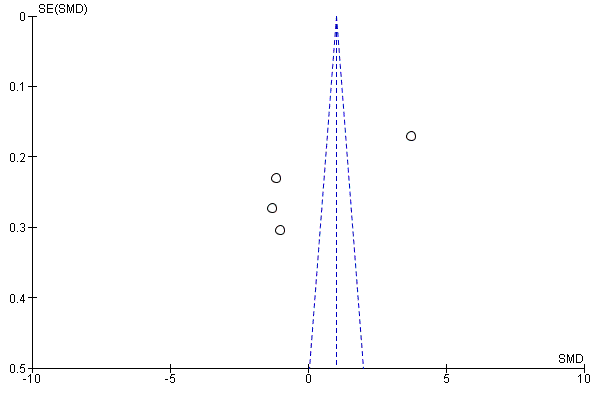

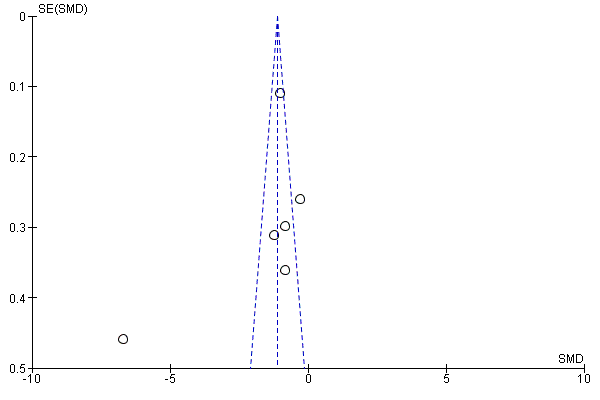


(f)

(e)


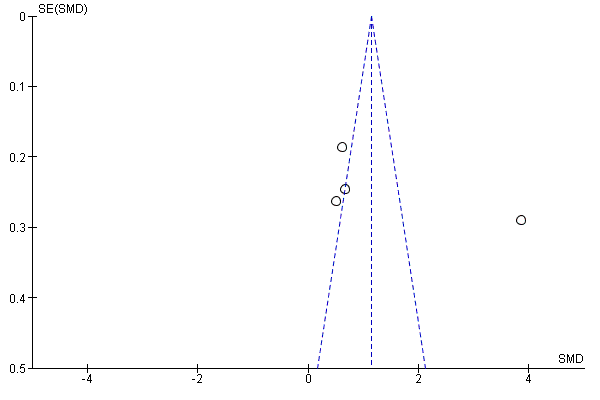


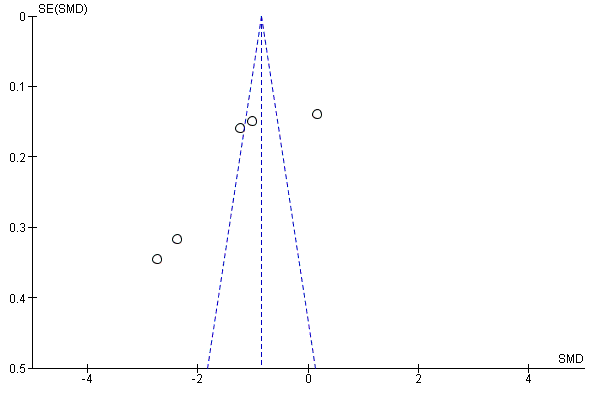

Supplement: Supplementary file 1 [file b794dcbbffca206f37cc74be.docx]
